# Supplementary material for: Assessing the Training in Neurosurgery with the Implementation of VITOM-3D Exoscope: Learning Curve on Experimental Model in Neurosurgical Practice
Source: MDPI journal article supplement (doi:10.3390/brainsci13101409), 2023-10-02
Supplement: s1 [file brainsci-2588963-supplementary.pdf › brainsci-2588963-supplementary.pdf]

**Table S1.** Duroplasty evaluation. Yrs of NS: number of years of experience in neurosurgery. #: number of task's iteration.

| Group  | Subject | Yrs of NS | #1   | #2   | #3   | #4   | #5   | #6  |
|--------|---------|-----------|------|------|------|------|------|-----|
| Junior | 1       | 0         | 1    | 4    | 2    | 2    | 4    | 4   |
|        | 2       | 0         | 1    | 0    | 5    | 0    | 4    | 5   |
|        | 3       | 0         | 5    | 4    | 2    | 4    | 4    | 5   |
|        | 4       | 0         | 0    | 4    | 2    | 2    | 2    | 2   |
|        | 5       | 0         | 1    | 1    | 2    | 4    | 5    | 5   |
|        | 6       | 1         | 1    | 4    | 4    | 5    | 3    | 4   |
|        | 7       | 1         | 2    | 5    | 1    | 4    | 5    | 4   |
|        | 8       | 2         | 0    | 2    | 2    | 2    | 2    | 1   |
|        | 9       | 3         | 4    | 4    | 5    | 5    | 5    | 5   |
|        | 10      | 1         | 4    | 5    | 4    | 5    | 4    | 4   |
|        | 11      | 3         | 2    | 4    | 4    | 4    | 5    | 5   |
|        | 12      | 3         | 5    | 5    | 3    | 5    | 5    | 5   |
|        | 13      | 2         | 1    | 1    | 3    | 4    | 5    | 4   |
| Senior | 14      | 6         | 4    | 3    | 4    | 5    | 4    | 4   |
|        | 15      | 7         | 4    | 4    | 5    | 4    | 5    | 5   |
|        | 16      | 10        | 1    | 1    | 3    | 3    | 4    | 5   |
|        | 17      | 14        | 2    | 4    | 4    | 5    | 5    | 5   |
|        | 18      | 20        | 4    | 5    | 5    | 4    | 5    | 5   |
| Mean   |         |           | 2    | 4    | 3,5  | 4    | 4,5  | 5   |
| St Dev |         |           | 1.67 | 1.56 | 1.25 | 1.37 | 0.98 | 1.1 |

**Table S2.** Mean score of self-assessment for the whole cohort of participants. #: number of task's iteration.

| Domain                                           | Self-assessment                    | #1  | #2  | #3  | #4  | #5 | #6  |
|--------------------------------------------------|------------------------------------|-----|-----|-----|-----|----|-----|
| Self-perception of stress and quality of results | Perceived difficulty               | 4   | 3   | 3   | 2,5 | 2  | 2   |
|                                                  | Perceived stress                   | 3   | 3   | 2   | 2   | 1  | 1   |
|                                                  | Perceived result                   | 3   | 3,5 | 3   | 3   | 4  | 4   |
|                                                  | Perceived error                    | 3   | 3   | 3   | 3   | 2  | 2   |
| Need for training in microscopy                  | Need to convert in OM              | 1   | 1   | 1   | 1   | 1  | 1   |
|                                                  | Need for training                  | 4   | 4   | 3,5 | 4   | 4  | 4   |
|                                                  | Need for previous experience in OM | 4   | 4   | 4   | 4   | 4  | 4   |
|                                                  | Need for further training in OM    | 2,5 | 2   | 2   | 4   | 2  | 2,5 |
| Overall comfort                                  | Nausea                             | 1   | 1   | 1   | 1   | 1  | 1   |
|                                                  | Eye discomfort                     | 1   | 1   | 1   | 1   | 1  | 1   |
|                                                  | Headache                           | 1   | 1   | 1   | 1   | 1  | 1   |
|                                                  | Neck pain                          | 1   | 1   | 1   | 1   | 1  | 1   |
